# Supplementary material for: Choice-based severity scale (CSS): assessing the relative severity of procedures from a laboratory animal’s perspective
Source: PeerJ journal article supplement (doi:10.7717/peerj.17300), 2024-06-17
Supplement: Analysis_code_and_data.zip [file Analysis_code_and_data.zip]

Metadata for:

*Choice-based Severity Scale (CSS): Assessing the relative severity of procedures  
from a laboratory animal's perspective*

Lauren C. Cassidy, Stefan Treue, Alexander Gail, and Dana Pfefferle

**Table 1: Variables, their definitions, and the levels or range of the variables for the condition stimuli training data (data set 1).**

| Variables        | Definition                                                                                             | Levels/Range                                                                                                                                                                                                                                    |
|------------------|--------------------------------------------------------------------------------------------------------|-------------------------------------------------------------------------------------------------------------------------------------------------------------------------------------------------------------------------------------------------|
| monkeyID         | Identity of the monkey being trained (data examined separately by monkey).                             | <i>monkeyD</i> : monkey D<br><i>monkeyH</i> : monkey H<br><i>monkeyE</i> : monkey E                                                                                                                                                             |
| testPhase        | Experimental phase of the Choice-based Severity Assessment (factor).                                   | 1: choice between the upper cage and lab conditions (same reward type in task).<br>2: choice between the lower cage and lab conditions (same reward type in task).<br>3: lower cage condition vs. lab condition (different fluid type in task). |
| boutNum          | Number of bouts that the monkey was tested (covariate).                                                | Range: 1 to 10.                                                                                                                                                                                                                                 |
| cond1            | The first of two conditions simultaneously presented to the monkey to choose between (factor).         | <i>upperCage</i> : monkey moves to the upper cage to conduct the basic experimental task.<br><i>lowerCage</i> : monkey moves to the lower cage to conduct the basic experimental task.                                                          |
| cond2            | The second of two conditions simultaneously presented to the monkey to choose between (factor).        | <i>lab</i> : monkey is transported to the lab to conduct the basic experimental task.                                                                                                                                                           |
| cond1_rewardType | Type of reward received for correct trials during the basic experimental task of condition 1 (factor). | <i>grapeJuice</i> : correct trials were rewarded with grape juice.<br><i>water</i> : correct trials were rewarded with water.                                                                                                                   |
| cond2_rewardType | Type of reward received for correct trials during the basic experimental task of condition 2 (factor). | <i>grapeJuice</i> : correct trials were rewarded with grape juice.<br><i>bananaJuice</i> : correct trials were rewarded with banana juice.                                                                                                      |
| rewardDifference | Difference in the number of drops of reward distributed for correct                                    | <i>largelyFavorsLab</i> : 9 drops distributed for correct trials of                                                                                                                                                                             |

| Variables      | Definition                                                                                                  | Levels/Range                                                                                                                                                                                                                                                                                          |
|----------------|-------------------------------------------------------------------------------------------------------------|-------------------------------------------------------------------------------------------------------------------------------------------------------------------------------------------------------------------------------------------------------------------------------------------------------|
|                | trials in the basic experimental task of each condition (factor).                                           | the basic experimental task in the lab condition and 1 drop for correct trials of the same task in the cage condition.<br><i>mildlyFavorsLab</i> : 7 vs. 3 drops.<br><i>equallyRewarded</i> : 5 vs. 5 drops.<br><i>mildlyFavorsCage</i> : 3 vs. 7 drops.<br><i>largelyFavorsCage</i> : 1 vs. 9 drops. |
| cageCond_count | Number of times the monkey chose the cage condition in the bout of choice sessions (to calculate response). | Range: 0 to 3.                                                                                                                                                                                                                                                                                        |
| labCond_count  | Number of times the monkey chose the lab condition in the bout of choice sessions (to calculate response).  | Range: 0 to 3.                                                                                                                                                                                                                                                                                        |
| total          | Total number of choice sessions completed within the bout (to calculate response).                          | Range: 1 to 3.                                                                                                                                                                                                                                                                                        |
| boutProp       | Proportion of the bout of choice sessions (see “total”) that the lab condition was chosen (response).       | Range: 0 to 1.                                                                                                                                                                                                                                                                                        |

**Table 2: Variables, their definitions, and the levels or range of the variables for the Choice-based Severity Scale test data (data set 2).**

| Variables      | Definition                                                                | Levels/Range                                                                                                                                                                                                                  |
|----------------|---------------------------------------------------------------------------|-------------------------------------------------------------------------------------------------------------------------------------------------------------------------------------------------------------------------------|
| dateTested     | Date that the monkey was tested (random effect).                          | From 2022-04-25 to 2022-05-06                                                                                                                                                                                                 |
| monkeyID       | Identity of the monkey being tested (data analyzed separately by monkey). | <i>monkeyD</i> : monkey D<br><i>monkeyH</i> : monkey H<br><i>monkeyE</i> : monkey E                                                                                                                                           |
| sessionNum     | Number of the session that the monkey was tested (covariate).             | Range: 1 to 10.                                                                                                                                                                                                               |
| trialNum       | Number of the trial within a session (covariate).                         | Range: 1 to 391.                                                                                                                                                                                                              |
| choicePosition | Position of selected option on the touchscreen (factor).                  | <i>left</i> : selected option positioned on the left of the touchscreen.<br><i>right</i> : selected option positioned on the right of the touchscreen.                                                                        |
| optionChosen   | Option selected by the monkey at the beginning of the trial (response).   | <i>shortHold</i> : the monkey had to hold a sensor between 1 and 4 s to receive 0.2 to 0.3 ml water reward.<br><i>longHold</i> : the monkey had to hold a sensor between 10 and 40 s to receive 15.2 to 15.3 ml juice reward. |

**Table 3: Variables, their definitions, and the levels or range of the variables for the condition stimuli training data in preparation for the Choice-based Severity Assessment (data set 3).**

| <b>Variables</b> | <b>Definition</b>                                                          | <b>Levels/Range</b>                                                                                                                                                                                                                                                                                                                                 |
|------------------|----------------------------------------------------------------------------|-----------------------------------------------------------------------------------------------------------------------------------------------------------------------------------------------------------------------------------------------------------------------------------------------------------------------------------------------------|
| dateTested       | Date that the monkey was trained (random effect).                          | From 2020-11-03 to 2021-09-30.                                                                                                                                                                                                                                                                                                                      |
| monkeyID         | Identity of the monkey being trained (data analyzed separately by monkey). | <i>monkeyD</i> : monkey D<br><i>monkeyH</i> : monkey H<br><i>monkeyE</i> : monkey E                                                                                                                                                                                                                                                                 |
| sessionNum       | Number of the session that the trial type was trained (covariate).         | Range: 1 to 27.                                                                                                                                                                                                                                                                                                                                     |
| trialType        | Type of stimuli presented to the monkey (factor).                          | <i>upperCage</i> : upper cage condition stimulus presented simultaneously with a timeout stimulus (for monkey D and H).<br><i>lowerCage</i> : lower cage condition stimulus presented simultaneously with a timeout stimulus (for monkey E).<br><i>lab</i> : lab condition stimulus presented simultaneously with a timeout stimulus (all monkeys). |
| correct          | Number of correct trials completed by the monkey (response).               | Range: 0 to 39.                                                                                                                                                                                                                                                                                                                                     |
| total            | Total number of trials completed by the monkey (response).                 | Range: 2 to 44.                                                                                                                                                                                                                                                                                                                                     |
